# Supplementary material
Source: MDPI journal article supplement (https://www.mdpi.com/2073-4344/8/6/253)
Supplement: s1 [file s1]

## Article

# Desilicated ZSM-5 Zeolites for the Production of Renewable *p*-Xylene via Diels–Alder Cycloaddition of Dimethylfuran and Ethylene

Joel McGlone, Peter Priece, Luigi Da Vià, Liqaa Majdal and Jose A. Lopez-Sanchez \*

Stephenson Institute for Renewable Energy, Department of Chemistry, University of Liverpool, Liverpool L69 7ZD, UK; jomcgl1@hotmail.com (J.M.); peter.priece@liverpool.ac.uk (P.P.); davia.luigi@gmail.com (L.D.V.); L.I.Majdal@liverpool.ac.uk (L.M.)

\* Correspondence: jals@liverpool.ac.uk; Tel.: +44-151-79-43535

Received: 30 April 2018; Accepted: 14 June 2018; Published: date

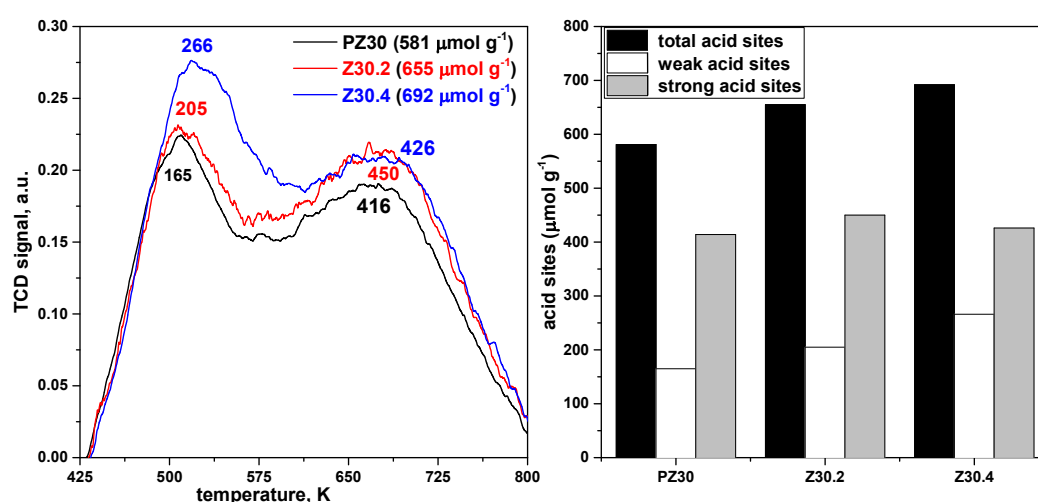

**Figure S1.** NH<sub>3</sub>-TPD profile (left) and column view of number of acid sites (right) of untreated and treated Z30. Adsorption of NH<sub>3</sub> was performed for 30 min at 150 °C followed by inert flush and TPD up to 700 °C. Columns legend: total acidity (black), weak acid sites (pattern), and strong acid sites (grey).

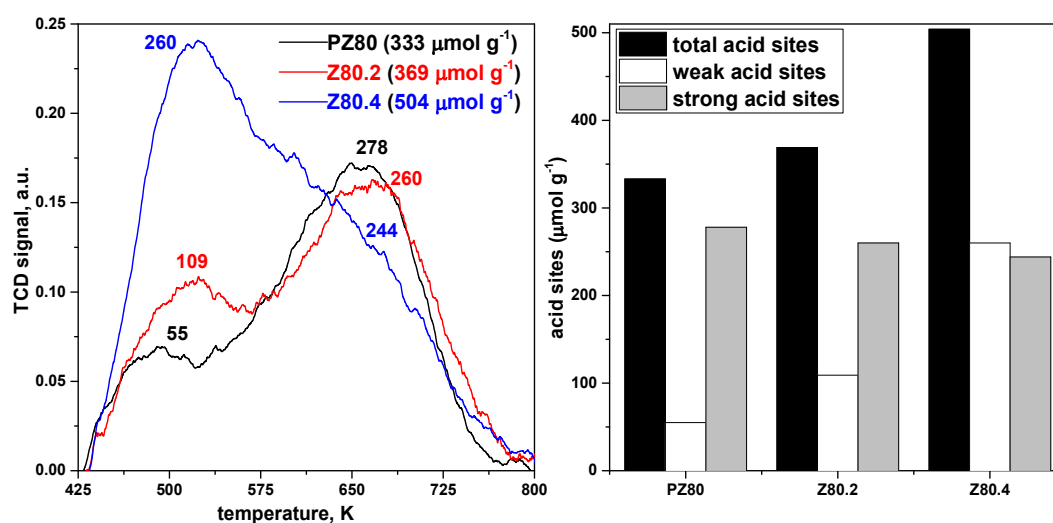

**Figure S2.** NH<sub>3</sub>-TPD profile (left) and column view of number of acid sites (right) of untreated and treated Z80. Adsorption of NH<sub>3</sub> was performed for 30 min at 150 °C followed by inert flush and TPD up to 700 °C. Columns legend: total acidity (black), weak acid sites (pattern), and strong acid sites (grey).

PZ30 (A)

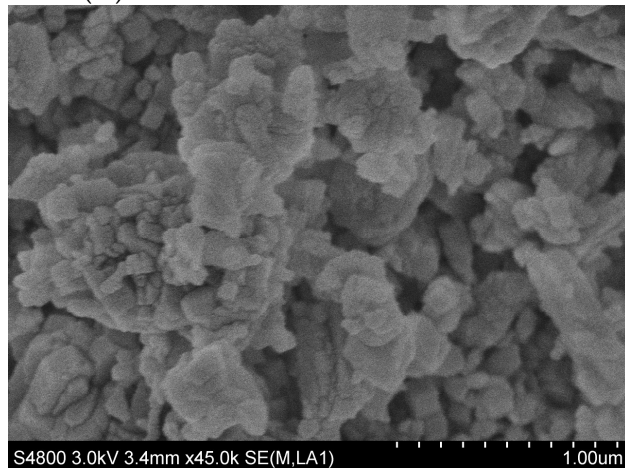

Z30.2 (D)

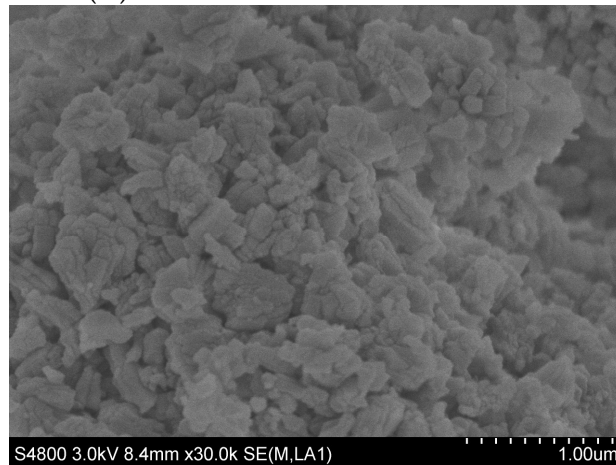

PZ30 (B)

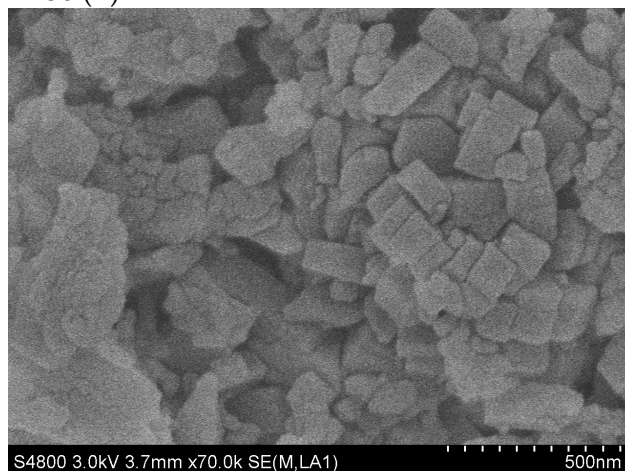

Z30.2 (E)

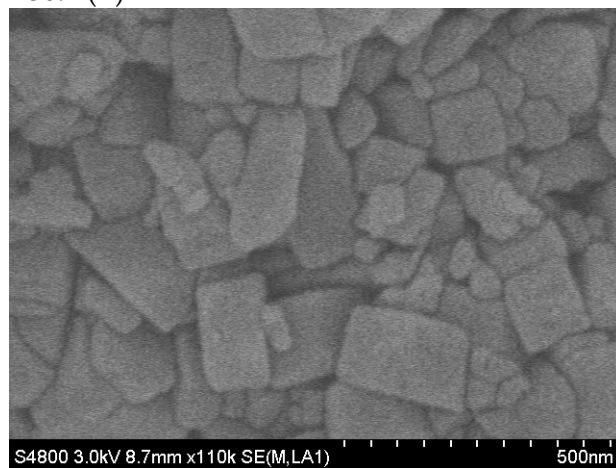

PZ30 (C)

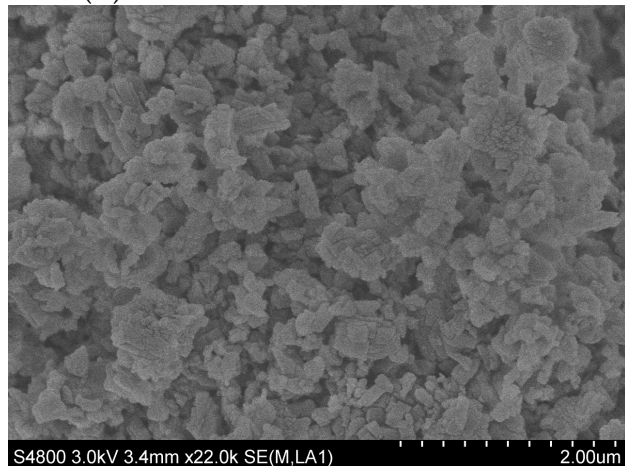

Z30.2 (F)

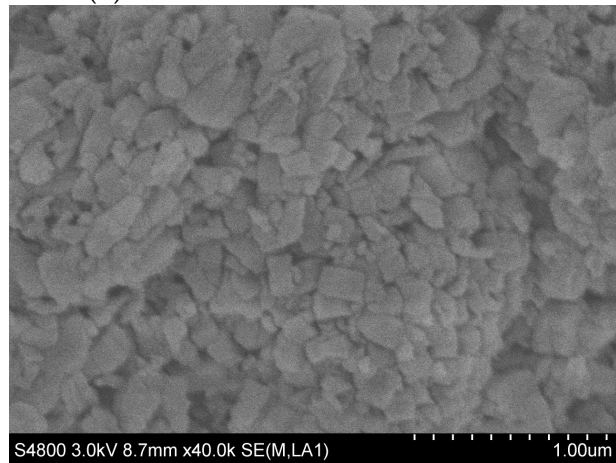**Figure S3.** SEM micrographs of PZ30 (A–C) and Z30 (D–F).

PZ80 (A)

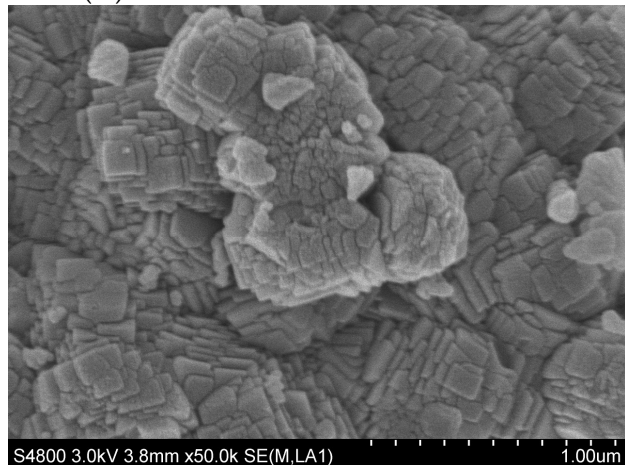

Z80.2 (D)

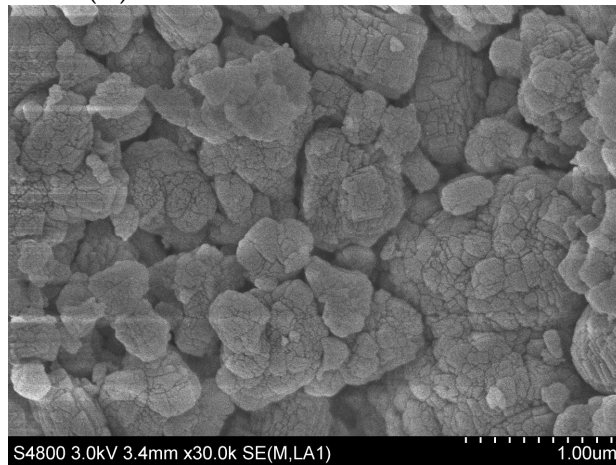

PZ80 (B)

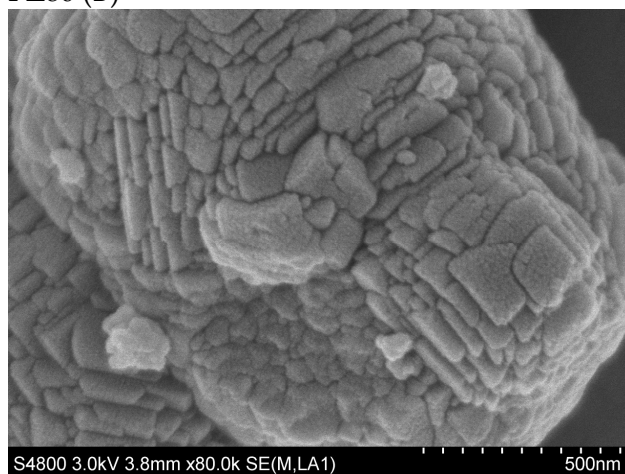

Z80.2 (E)

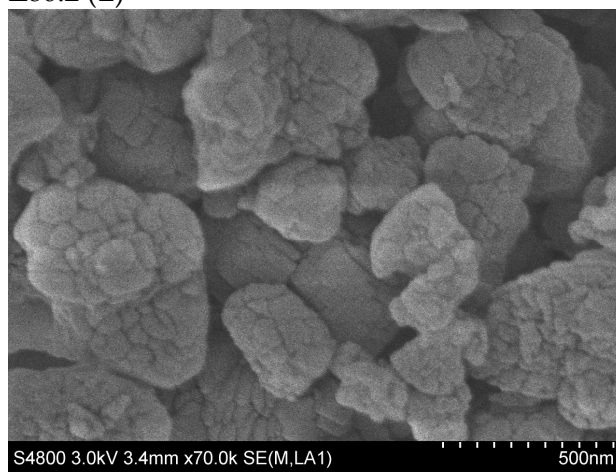

PZ80 (C)

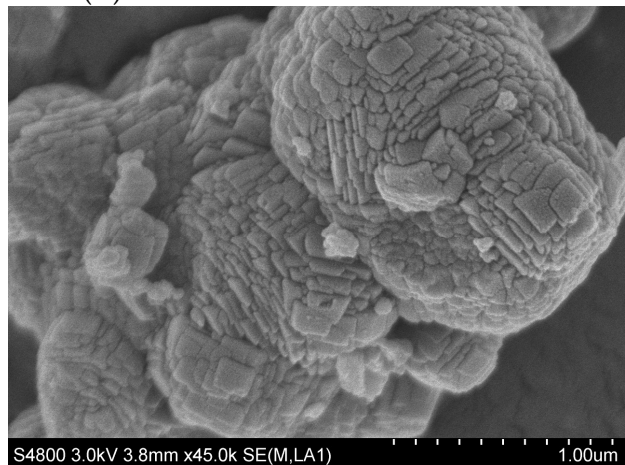

Z80.2 (F)

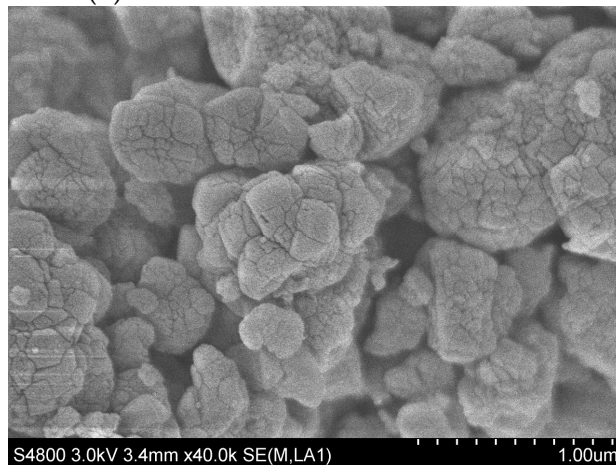**Figure S4.** SEM micrographs of PZ80 (A–C) and Z80.2 (D–F).

**Table S1.** Results of Diels–Alder catalytic testing of DMF and ethylene over untreated and treated H-ZSM-5. Reaction conditions: 5.5 mL DMF, 0.45 mL tridecane (internal standard), 16.5 mL hexane, 110 mg catalyst, 20 h. Conversions and selectivities in %. HDO is 2,5-hexanedione, MCP is 3-methyl-2-cyclopentenone, AP are alkylated products, HA are higher aromatics. The rest is selectivity to unknown products. The carbon mass balance was in all cases >94%.

| sample | T <sub>R</sub> , °C | p <sub>total</sub> , bar | X, % | S( <i>p</i> -xylene), % | S(HDO), % | S(MCP), % | S(AP), % | S(HA), % |
|--------|---------------------|--------------------------|------|-------------------------|-----------|-----------|----------|----------|
| PZ30   | 180                 | 40                       | 19.3 | 43.2                    | 17.7      | 0.4       | 6.5      | 32.2     |
| Z30.2  | 180                 | 40                       | 36.0 | 44.1                    | 23.9      | 1.1       | 4.4      | 26.4     |
| Z30.4  | 180                 | 40                       | 27.1 | 38.3                    | 26.0      | 0.7       | 5.5      | 29.5     |
| PZ80   | 180                 | 40                       | 21.3 | 36.7                    | 16.3      | 1.9       | 5.4      | 39.7     |
| Z80.2  | 180                 | 40                       | 37.0 | 34.7                    | 32.3      | 1.2       | 2.1      | 29.7     |
| Z80.4  | 180                 | 40                       | 36.1 | 31.1                    | 28.4      | 1.0       | 1.8      | 37.8     |
| PZ80   | 250                 | 55                       | 16.0 | 50.7                    | 10.8      | 1.2       | 12.2     | 25.0     |
| Z80.2  | 250                 | 40*                      | 18.2 | 48.7                    | 14.5      | 1.5       | 15.0     | 20.3     |
| Z80.2  | 250                 | 55                       | 51.0 | 59.4                    | 11.9      | 2.1       | 11.5     | 15.1     |

\* high hexane vapour pressure, low ethylene pressure.

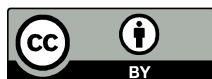

© 2018 by the authors. Licensee MDPI, Basel, Switzerland. This article is an open access article distributed under the terms and conditions of the Creative Commons Attribution (CC BY) license (<http://creativecommons.org/licenses/by/4.0/>).
